# Supplementary material for: Encuesta internacional, las grabaciones preferidas por la crítica: Carlos Gómez Amat
Source: publisher site journal article supplement (doi:10.18632/aging.204300), 1977-01-01
Supplement: Supplementary file [file aging-v14i20-204300-supplementary-material-SD2.pdf]

## SUPPLEMENTARY TABLES

**Supplementary Table 1. RT-qPCR primers.**

| Primer name         | Sequence                       | Annealing temperature (° C) | Product length (bp) |
|---------------------|--------------------------------|-----------------------------|---------------------|
| ATM s               | 5'-AGCTCGGATGCTTTCTCAA-3'      | 60                          |                     |
| ATM as              | 5'-CTCCATCGAGAAGGTCCACG-3'     |                             |                     |
| CD133 s             | 5'-GACTTGCGAACTCTCTTGAATGA-3'  | 60                          | 222                 |
| CD133 as            | 5'-GGTAGTGTTGTACTGGGCCAAT-3'   |                             |                     |
| CDKN2A s            | 5'-CAACGCACCGAATAGTTACG-3'     | 60                          |                     |
| CDKN2A as           | 5'-AGCACCACCAGCGTGTC-3'        |                             |                     |
| GDNF s              | 5'-GTCAAGAGAGGGTTTTCCGGT-3'    | 60                          | 105                 |
| GDNF as             | 5'-ATCTTAAAGTCCCGTCCGGC-3'     |                             |                     |
| LMNA (Exon 9-12) s  | 5'-GGCTGCGGGAACAGC-3'          | 60                          | 500                 |
| LMNA (Exon 9-12) as | 5'-CTGGCAGGTCCC-3'             |                             |                     |
| MAT2b s             | 5'-ACAGAGAGGAAGACATACCAG-3'    | 60                          | 324                 |
| MAT2b as            | 5'-GTTTCATTGCCAGACCAGTG-3'     |                             |                     |
| OSR1 s              | 5'-GCTAAAGCCCCAGAGACGTG-3'     | 60                          | 80                  |
| OSR1 as             | 5'-TTCGGTAGTTGCAGTGGCTT-3'     |                             |                     |
| RPL0 s              | 5'-TCGACAAATGGCAGCATCTAC-3'    | 60                          | 195                 |
| RPL0 as             | 5'-ATCCGTCTCCACAGACAAGG-3'     |                             |                     |
| SIRT1 (Exon 1-2) s  | 5'-AGGGCGAGGAGGAGGAAGAG-3'     | 60                          | 122                 |
| SIRT1 (Exon 1-2) as | 5'-GGCTCTATCCTCCTCATCACTTTC-3' |                             |                     |
| SIRT1 (Exon 7-8) s  | 5'-GCAGATTAGTAGGCGGCTTG-3'     | 60                          | 152                 |
| SIRT1 (Exon 7-8) as | 5'-TCTGGCATGTCCCACTATCA-3'     |                             |                     |
| SIRT1 bseq s        | 5'-GAGGGAGGAGGGTTAGAGAG-3'     | 55                          | 341                 |
| SIRT1 bseq as       | 5'-CATTATCTCCTTCCCCAACC-3'     |                             |                     |
| SIX2 s              | 5'-GGTATTATGTTTATGTTGTTTAT-3'  | 60                          | 232                 |
| SIX2 as             | 5'-AACTAATAACTCTCCAAAATCT-3'   |                             |                     |

**Supplementary Table 2. Antibodies.**

| Antigen                     | Company                         | Dilution (IF/WB) |
|-----------------------------|---------------------------------|------------------|
| Mouse $\beta$ -Actin        | Cell Signaling #3700            | n.a./1:5000      |
| Rabbit pAKT (Ser473)        | Cell Signaling #9271            | n.a./1:1000      |
| Rabbit total AKT            | Cell Signaling #9272            | n.a./1:1000      |
| Rabbit pGSK3 $\beta$ (Ser9) | Cell Signaling #5558            | n.a./1:1000      |
| Rabbit total GSK3 $\beta$   | Cell Signaling #5676            | n.a./1:1000      |
| Rabbit pH2A.X (Ser139)      | Cell Signaling #9718S           | 1:200/1:1000     |
| Mouse TP53                  | Merck Millipore #OP43           | n.a./1:1000      |
| Mouse SIRT1                 | Abcam #ab110304                 | 1:200/1:1000     |
| Mouse SIX2                  | Abnova #H00010736-1101          | 1:200/n.a.       |
| Anti-mouse Alexa Fluor 488  | Invitrogen #A11070              | 1:500            |
| Anti-rabbit Alexa Fluor 555 | Invitrogen #A21424              | 1:500            |
| Anti-mouse HRP-labeled      | Thermo Fisher Scientific #NA931 | 1:4000           |
| Anti-rabbit HRP-labeled     | Cell Signaling #7074S           | 1:1000           |
